# Supplementary material for: Assessing Water Quality Dynamics in Tidally Influenced Blackwater Rivers along a Rural–Urban Gradient
Source: MDPI journal article supplement (doi:10.3390/w15234154), 2023-11-30
Supplement: s1 [file s1]

**Table S1.** Kruskal-Wallis p-values for the comparison of water quality parameters three days before and after the Nor'easter event. Data from the Urban site was unobtainable for this storm event.

| Site      | Salinity | pH    | Turb. | Chl-a | FDOM | DO   | Temp. |
|-----------|----------|-------|-------|-------|------|------|-------|
| Suburban  | 0.35     | 0.01  | 0.41  | <0.01 | 0.46 | 0.09 | 0.42  |
| Rural     | 0.94     | <0.01 | 0.35  | 0.35  | 0.18 | 0.63 | 0.18  |
| Estuarine | 0.26     | 0.02  | 0.56  | 0.07  | 0.41 | 0.63 | 0.36  |
| Inlet     | 0.55     | <0.01 | 0.42  | 0.35  | 0.45 | 0.55 | 0.31  |

**Table S2.** Kruskal-Wallis p-values for the comparison of water quality parameters three days before and after the November 5<sup>th</sup> rainfall event.

| Site      | Salinity | pH    | Turb. | Chl-a | FDOM | DO    | Temp. |
|-----------|----------|-------|-------|-------|------|-------|-------|
| Urban     | 0.19     | <0.01 | 0.04  | 0.04  | 0.45 | 0.03  | 0.27  |
| Suburban  | 0.16     | <0.01 | 0.19  | 0.31  | 0.40 | 0.06  | 0.35  |
| Rural     | 0.57     | <0.01 | 0.79  | 0.36  | 0.04 | <0.01 | 0.07  |
| Estuarine | 0.38     | <0.01 | 0.75  | 0.54  | 0.41 | <0.01 | 0.26  |

**Table S3.** Means and standard deviations of FDOM and turbidity for sites during a Nor'easter event that occurred between September 15-25, 2020. Data from the Urban site was unobtainable for this storm event. GTMNERR sites were not included because they do not possess FDOM sensors.

| Site      | FDOM     |       | Turbidity |      | % Urban | Dist. from Freshwater (km) | Dist. from Inlet (km) |
|-----------|----------|-------|-----------|------|---------|----------------------------|-----------------------|
|           | Std. Dev | Mean  | Std. Dev. | Mean |         |                            |                       |
| Suburban  | 42.8     | 69.4  | 23.7      | 24.7 | 41.6    | 6                          | 11.25                 |
| Rural     | 11.3     | 146.1 | 0.6       | 2.2  | 4.8     | 0.5                        | 21                    |
| Estuarine | 45.8     | 82.2  | 4.4       | 9.9  | N/A     | 12.5                       | 9.5                   |
| Inlet     | 19.7     | 39.6  | 11.3      | 22.7 | N/A     | 13.5                       | 1.5                   |

**Table S4.** Means and standard deviations of FDOM and turbidity for sites during three rain events that occurred between November 1-10, 2020. GTMNERR sites were not included because they do not possess FDOM sensors.

| Site      | FDOM      |       | Turbidity |      | % Urban | Dist. from Freshwater (km) | Dist. from Inlet (km) |
|-----------|-----------|-------|-----------|------|---------|----------------------------|-----------------------|
|           | Std. Dev. | Mean  | Std. Dev. | Mean |         |                            |                       |
| Urban     | 17.0      | 68.5  | 1.3       | 4.3  | 56.2    | 5.5                        | 9.3                   |
| Suburban  | 36.5      | 75.9  | 3.5       | 12.4 | 41.6    | 6                          | 11.25                 |
| Rural     | 7.3       | 182.2 | 3.9       | 2.0  | 4.8     | 0.5                        | 21                    |
| Estuarine | 22.1      | 45.8  | 9.5       | 9.0  | N/A     | 12.5                       | 9.5                   |
| Inlet     | 5.0       | 17.7  | 2.2       | 7.4  | N/A     | 13.5                       | 1.5                   |

**Table S5. (a)** Variables and their corresponding contribution for the first three principal components Urban, Suburban, and Rural sites were analyzed; **(b)** Variables and their corresponding contribution for the first three principal components when all sites were analyzed.

| (a)                           | PC 1  | PC2   | PC3   | (b)                           | PC 1  | PC2  | PC3   |
|-------------------------------|-------|-------|-------|-------------------------------|-------|------|-------|
| <b>Site</b>                   | 12.91 | 0.01  | 4.12  | <b>Site</b>                   | 16.19 | 0.05 | 0.04  |
| <b>Distance to Inlet</b>      | 14.22 | 0.90  | 1.00  | <b>Distance to Inlet</b>      | 16.90 | 0.04 | 0.56  |
| <b>Distance to Freshwater</b> | 13.82 | 1.73  | 0.23  | <b>Distance to Freshwater</b> | 15.07 | 0.41 | 2.20  |
| <b>Salinity</b>               | 14.41 | 0.17  | 0.06  | <b>Salinity</b>               | 16.87 | 0.25 | 0.77  |
| <b>pH</b>                     | 13.04 | 2.79  | 0.88  | <b>pH</b>                     | 7.13  | 0.59 | 2.76  |
| <b>Dissolved Oxygen</b>       | 10.43 | 0.37  | 22.82 | <b>Dissolved Oxygen</b>       | 16.31 | 2.90 | 0.05  |
| <b>Turbidity</b>              | 3.84  | 66.58 | 20.55 | <b>Turbidity</b>              | 2.88  | 4.25 | 58.93 |
| <b>Chlorophyll-a</b>          | 6.38  | 27.02 | 50.26 | <b>Chlorophyll-a</b>          | 8.57  | 1.51 | 28.34 |
| <b>FDOM</b>                   | 10.95 | 0.42  | 0.10  |                               |       |      |       |
